# Supplementary material
Source: ML conference proceedings conference paper supplement (https://openaccess.thecvf.com/content/CVPR2026/html/Ahmed_Boundary-Responsive_Differentiable_Gating_CVPR_2026_paper.html)
Supplement: Supplementary file 1 [file Ahmed_Boundary-Responsive_Differentiable_Gating_CVPR_2026_supplemental.pdf]

## A. Per-Class analysis Table

| Model      | BT          | IS          | IC          | IW          | KP          | CK          | S-Intes     | Thread      | Clamps      | SN          | SI          | UP          |
|------------|-------------|-------------|-------------|-------------|-------------|-------------|-------------|-------------|-------------|-------------|-------------|-------------|
| U-Net      | 0.65        | 0.72        | 0.37        | 0.45        | 0.43        | 0.07        | 0.70        | 0.38        | 0.76        | <u>0.91</u> | 0.70        | 0.18        |
| DeeplabV3+ | <u>0.68</u> | 0.69        | <b>0.59</b> | <u>0.55</u> | 0.58        | 0.53        | 0.50        | 0.45        | 0.57        | 0.55        | 0.58        | 0.54        |
| Mask-RCNN  | <u>0.68</u> | <b>0.82</b> | <u>0.40</u> | <b>0.56</b> | <u>0.64</u> | 0.18        | 0.00        | 0.03        | 0.45        | 0.00        | 0.00        | 0.43        |
| TransUnet  | 0.59        | 0.60        | 0.32        | 0.33        | 0.01        | 1.00        | 0.61        | 0.04        | 0.64        | 0.63        | 0.61        | 0.48        |
| SegFormer  | 0.48        | 0.15        | 0.12        | 0.18        | 0.05        | 0.52        | <b>1.00</b> | <u>0.90</u> | <b>0.93</b> | 0.91        | <b>1.00</b> | <u>0.77</u> |
| MedT       | 0.40        | 0.54        | 0.16        | 0.44        | <b>0.82</b> | <b>0.96</b> | 0.84        | <u>0.90</u> | 0.61        | 0.78        | <u>0.84</u> | 0.65        |
| SNN        | 0.60        | 0.60        | 0.40        | 0.30        | 0.35        | 0.20        | 0.35        | 0.17        | 0.45        | 0.30        | 0.32        | 0.40        |
| HERS       | 0.58        | 0.55        | 0.44        | 0.40        | 0.48        | 0.52        | 0.38        | 0.28        | 0.50        | 0.42        | 0.46        | 0.41        |
| BRDG       | <b>0.69</b> | <u>0.76</u> | 0.29        | 0.43        | 0.52        | <u>0.55</u> | <u>0.90</u> | <b>0.94</b> | <u>0.91</u> | <b>0.99</b> | 0.78        | <b>0.89</b> |

Table 4. Per-class Intersection over Union (IoU) analysis on EndoVis2018 parts (Including Anatomy and tools parts) dataset. BT: Background Tissue, IS: Instrument Shaft, IC: Instrument Clasper, IW: Instrument Wrist, KP: Kidney Parenchyma, CK: Covered Kidney, S-Intes: Small Intestine, SN: Suturing-Needle, SI: Suction Instrument, UP: Ultrasound Probe. Bold indicates highest IoU per class; underlined indicates second highest.

| Model      | BF          | PF          | LND         | SI          | CA          | MCS         | UP          |
|------------|-------------|-------------|-------------|-------------|-------------|-------------|-------------|
| U-Net      | 0.66        | 0.18        | 0.48        | 0.74        | 0.80        | 0.67        | 0.62        |
| DeepLabv3+ | 0.82        | 0.70        | 0.66        | 0.83        | <u>0.92</u> | 0.78        | 0.78        |
| Mask-RCNN  | 0.55        | 0.40        | 0.32        | 0.50        | 0.58        | 0.45        | 0.42        |
| TransUNet  | 0.60        | 0.48        | 0.42        | 0.55        | 0.65        | 0.50        | 0.48        |
| SegFormer  | 0.11        | <u>0.87</u> | 0.82        | <u>0.85</u> | <b>0.95</b> | 0.27        | <b>0.97</b> |
| MedT       | 0.58        | 0.50        | 0.45        | 0.60        | 0.70        | 0.55        | 0.52        |
| SSN        | 0.45        | 0.40        | 0.32        | 0.48        | 0.55        | 0.38        | 0.37        |
| HERS       | 0.70        | 0.68        | 0.60        | 0.72        | 0.82        | <u>0.75</u> | 0.68        |
| BRDG       | <b>0.86</b> | <b>0.90</b> | <b>0.84</b> | <b>0.88</b> | 0.90        | <b>0.88</b> | <u>0.89</u> |

Table 5. Per-class Intersection over Union (IoU) analysis on EndoVis2018 dataset tools type. BF: Bipolar Forceps, PF: Prograsp Forceps, LND: Large Needle Driver, SI: Suction Instrument, CA: Clip Applier, MCS: Monopolar Curved Scissors, UP: Ultrasound Probe. Bold indicates highest IoU per class; underlined indicates second highest.

| Model      | BF          | PF          | LND         | VS          | GR          | MCS         | UP          |
|------------|-------------|-------------|-------------|-------------|-------------|-------------|-------------|
| U-Net      | 0.48        | 0.28        | 0.38        | 0.46        | 0.50        | 0.44        | 0.40        |
| DeepLabv3+ | 0.70        | 0.66        | 0.58        | 0.72        | <u>0.78</u> | 0.64        | 0.64        |
| Mask-RCNN  | 0.40        | 0.32        | 0.26        | 0.34        | 0.38        | 0.30        | 0.28        |
| TransUNet  | 0.45        | 0.38        | 0.32        | 0.40        | 0.44        | 0.35        | 0.34        |
| SegFormer  | 0.68        | 0.70        | <u>0.62</u> | <u>0.74</u> | 0.76        | <u>0.67</u> | <u>0.70</u> |
| MedT       | 0.53        | 0.46        | 0.40        | 0.48        | 0.52        | 0.45        | 0.44        |
| SSN        | 0.32        | 0.28        | 0.22        | 0.30        | 0.33        | 0.24        | 0.25        |
| HERS       | 0.60        | 0.55        | 0.48        | 0.58        | 0.62        | 0.52        | 0.50        |
| BRDG       | <b>0.82</b> | <b>0.84</b> | <b>0.76</b> | <b>0.86</b> | <b>0.88</b> | <b>0.80</b> | <b>0.85</b> |

Table 6. Per-class Intersection over Union (IoU) analysis on EndoVis2017 dataset tools. BF: Bipolar Forceps, PF: Prograsp Forceps, LND: Large Needle Driver, VS: Vessel Sealer, GR: Grasping Retractor, MCS: Monopolar Curved Scissors, UP: Ultrasound Probe. Bold indicates highest IoU per class; underlined indicates second highest.

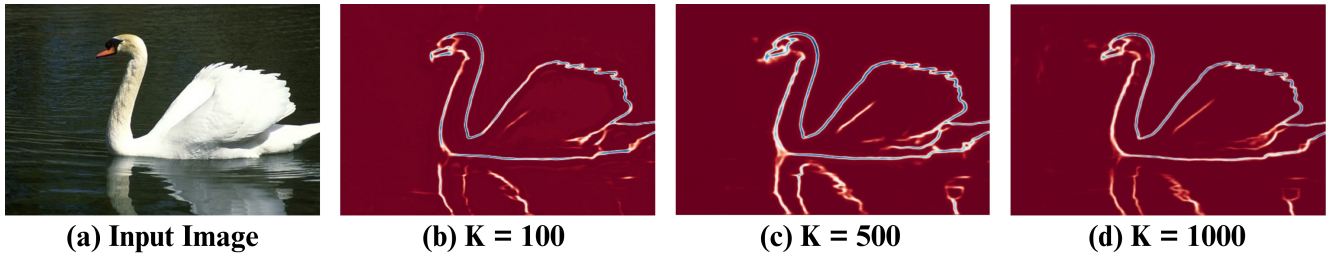

Figure 7. Effect of the number of superpixels ( $K$ ) on the BRDG's performance on the BSDS500 dataset, measured using Boundary Recall (BF)

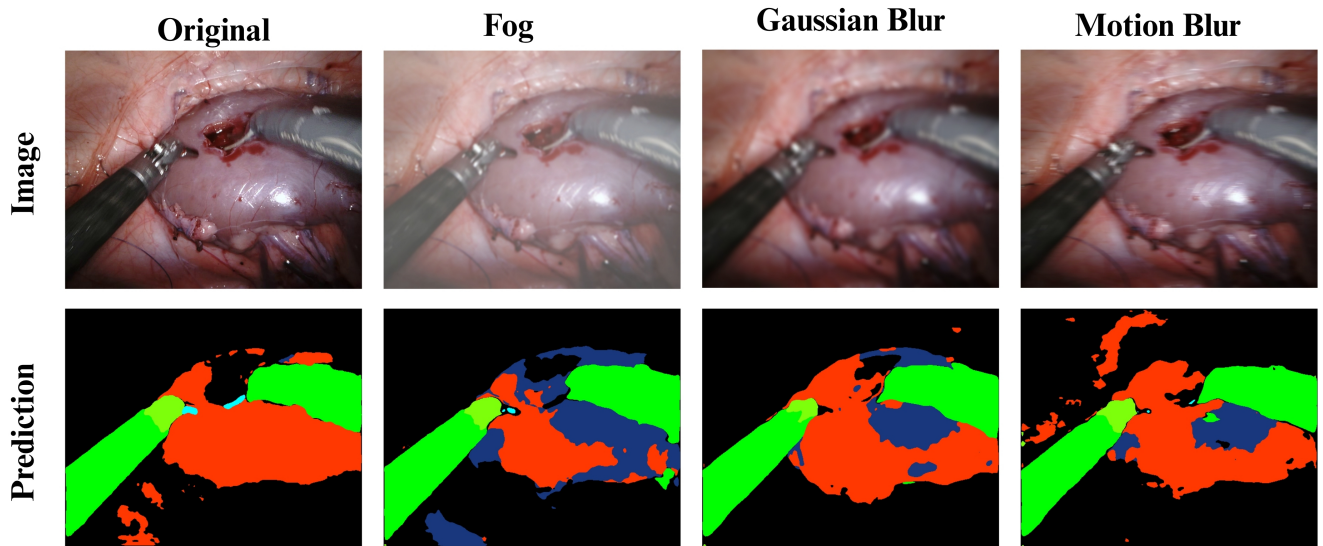

Figure 8. BRDG performance on augmented images

## B. Code

GitHub link: <https://github.com/fatma936-sudo/BRDG>
